# Supplementary material for: Viral Diversity in Samples of Freshwater Gastropods Benedictia baicalensis (Caenogastropoda: Benedictiidae) Revealed by Total RNA-Sequencing
Source: MDPI journal article supplement (doi:10.3390/ijms242317022), 2023-11-30
Supplement: s1 [file s1]

## Supplementary Figure

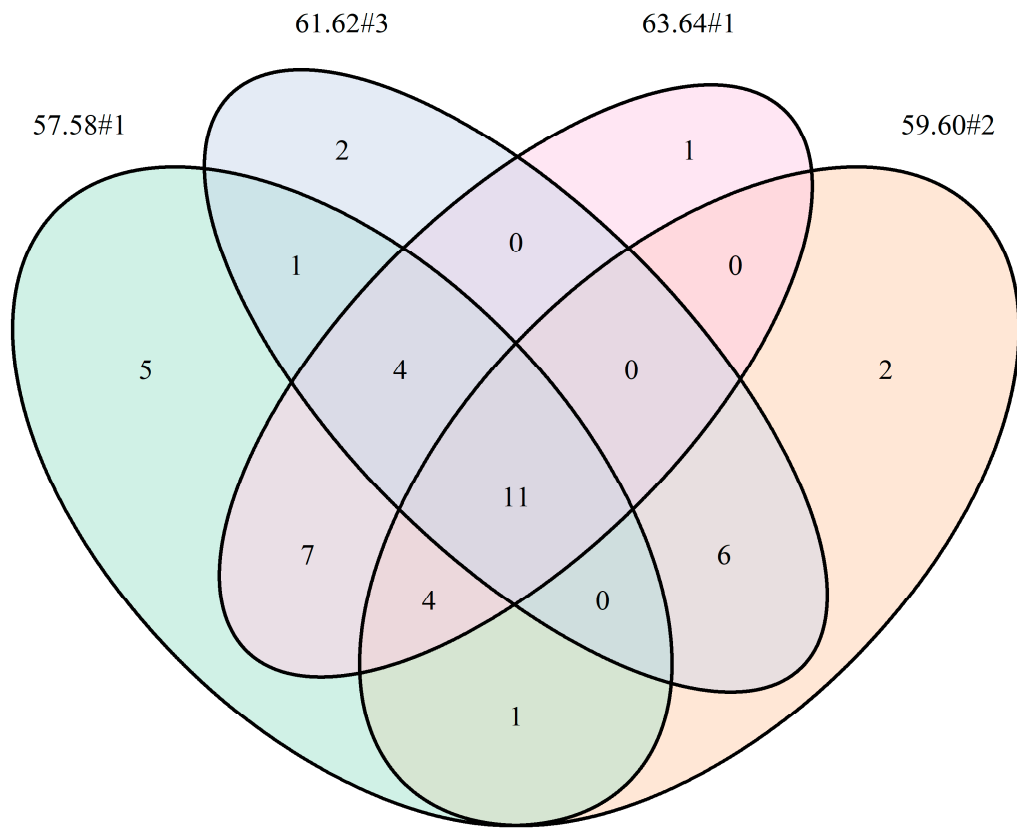

Figure S1. A Venn diagram showing the similarity of samples based on the number of common virotypes (constructed using the vegan package for R).
